# 1 Decoding differential gene expression

2 Shinya Tasaki<sup>1\*</sup>, Chris Gaiteri<sup>1</sup>, Sara Mostafavi<sup>2</sup>, Yanling Wang<sup>1</sup>

3 <sup>1</sup> Rush Alzheimer's Disease Center, Rush University Medical Center, Chicago IL, USA

4 <sup>2</sup> University of British Columbia, Vancouver, British Columbia, Canada

5 \* corresponding author

## 6 Abstract

7 Identifying the molecular mechanisms that control differential gene expression (DE) is a major goal of basic and disease  
8 biology. Combining the strengths of systems biology and deep learning in a model called *DEcode*, we are able to predict  
9 DE more accurately than traditional sequence-based methods, which do not utilize systems biology data. To determine  
10 the biological origins of this accuracy, we identify the most predictive regulators and types of regulatory interactions in  
11 *DEcode*, contrasting their roles across many human tissues. Diverse systems biology, ontological and disease-related  
12 assessments all point to the predominant influence of post-translational RNA-binding factors on DE. Through the  
13 combinatorial gene regulation that is captured in *DEcode*, it is even possible to predict relatively subtle person-to-person  
14 variation in gene expression. We demonstrate the broad applicability of these clinically-relevant predictions by predicting  
15 drivers of aging throughout the human lifespan, gene coexpression relationships on a genome-wide scale, and frequent  
16 DE in diverse conditions. Researchers can freely access *DEcode* to utilize genomic big data in identifying influential  
17 molecular mechanisms for any human expression data - [www.differentialexpression.org](http://www.differentialexpression.org).

## 18 Introduction

19 While all human cells share DNA sequences, gene regulation differs among cell types and developmental stages, and in  
20 response to environmental cues and stimuli. Accordingly, when gene expression is not properly regulated, cellular  
21 homeostasis can be perturbed, often affecting cell function and leading to disease<sup>1</sup>. These distinctions between cell  
22 states are observed as differential expression (DE) of gene transcripts. DE have been cataloged for tens of thousands of  
23 gene expression datasets, in the context of distinctions between species, organs, and conditions. Despite the important

24 and pervasive nature of DE, it has been challenging to shift from these observations towards a coherent understanding  
25 of the underlying generative processes that would essentially decode DE— a transition which is essential for progress in  
26 basic and disease biology. We address this gap by exploiting novel computational and systems biology approaches to  
27 develop a predictive model of DE based on genome-wide regulatory interaction data. Utilizing diverse genomic  
28 datasets, we identify a complex, yet strikingly consistent set of principles that control DE. This model of differential  
29 expression, called DEcode, can be applied to the majority of current and future gene expression data, to accelerate basic  
30 and disease biology, by identifying the origins of DE in each experiment.

31 Diverse molecular interactions have been shown to generate DE, and jointly regulate gene expression at the  
32 transcriptional and post-transcriptional levels. Major classes of gene regulatory interactions have been cataloged at the  
33 genomic scale, including transcription factor (TF)-promoter interactions<sup>2</sup>, protein-RNA interactions<sup>3</sup>, RNA-RNA  
34 interactions<sup>4</sup>, chromatin interactions<sup>5</sup>, and epigenetic modifications on DNAs<sup>6</sup>, histones, and RNAs<sup>7</sup>. Statistical models  
35 of gene expression can help fulfill the purpose of these resources in describing the origins of gene regulation and DE<sup>1</sup>.  
36 However, such raw data resources have outpaced model development, likely due to the challenge of uniting diverse  
37 molecular data into a single accurate model.

38 Predicting DE on the basis of gene regulatory interactions is one initial approach to understanding its origins. Among  
39 many possible statistical approaches to predicting DE, deep learning (DL) blends diverse data sources in a way that  
40 approximates the convergence of regulatory interactions. Indeed, DL has been applied to genomic research<sup>8,9</sup> including  
41 RNA splicing<sup>10</sup>, genomic variant functions<sup>11</sup>, and RNA/DNA binding<sup>12</sup>. However, accurate prediction is only one  
42 component of understanding DE; additional genomic and systems biology analysis are helpful in understanding how  
43 predictions are fueled by existing molecular concepts, mechanisms, and classes.

44 To decode the basis of DE in terms of molecular regulatory interactions, we first learn to predict it with a high degree of  
45 accuracy, using a DL model we call “DEcode”. This model combines several types of gene regulatory interactions and  
46 allows us to prioritize the main systems and molecules that influence DE on a tissue-specific basis. We further establish  
47 likely molecular mechanisms for this gene regulation and validate the influence of the predicted strongest regulators. In  
48 parallel, we predict the origin of person-to-person DE, which is the major component of experimental and clinical studies.  
49 These particularly challenging predictions are validated on a genome-wide scale, as we identify key drivers of  
50 coexpression, and also drivers for phenotype-associated differential expression. These tests and applications indicate  
51 DEcode can combine multiple recent data sources, to extract regulators for arbitrary human DE signatures.

## 52 Results

### 53 Promoter and RNA features predict differential expression across human tissues

54 The overarching goal of this study is to accurately predict gene expression as a function of molecular interactions. These  
55 results should be tissue-specific, but also highlight major regulatory principles across tissues, and ideally have sufficient  
56 accuracy to predict the relatively small expression changes observed between individual humans. To accomplish this, we  
57 utilized deep convolutional neural networks in a system called DEcode that can predict inter-tissue variations and inter-  
58 person variations in gene expression levels from promoter and mRNA features (**Figure 1**). The promoter features  
59 included: the genomic locations of binding sites of 762 TFs and the mRNA features encompassed the locations of binding  
60 sites of 171 RNA-binding proteins (RNABPs) and 213 miRNAs in each mRNA (**Table S1**). DEcode takes the promoter  
61 features and the mRNA features for each gene as inputs and outputs its expression levels under various conditions. We  
62 note that the prediction is based on only the presence or absence of known binding sites, and other information such as  
63 gene expression levels of TFs, RNABPs, and miRNAs is not utilized. First, we applied the DEcode framework to tissue-  
64 specific human transcriptomes of 27,428 genes and 79,647 transcripts measured in the GTEX consortium<sup>13</sup> to predict  
65 log-fold changes across 53 tissues against the median log-TPM (transcripts per million) of all tissues, as well as the  
66 median log-TPM of all tissues with a multi-task learning architecture. To ensure rigorous model testing, we excluded all  
67 genes or transcripts coded in chromosome 1 from the training data and used them as the testing data for evaluating the  
68 performances of DEcode models. This procedure prevents information leaking from intra-chromosomal interactions and  
69 potential overlaps of regulatory regions (details of model construction in **Figure S1**). The predicted median TPM levels  
70 showed high consistency with the actual observations for both gene-level (Spearman's  $\rho = 0.81$ ) and transcript-level  
71 (Spearman's  $\rho = 0.62$ ) (**Figure 2A**). Moreover, the model predicted the differential transcript usage within the same  
72 gene (Spearman's  $\rho = 0.44$ ) (**Figure 2A**). The DEcode models also predicted the differential expression profiles across  
73 53 tissues for both gene (mean Spearman's  $\rho = 0.34$ ), transcript (mean Spearman's  $\rho = 0.32$ ), and transcript-usage  
74 levels (mean Spearman's  $\rho = 0.16$ ) (**Figure 2B**). The predicted gene expression for the testing genes was indeed tissue-  
75 specific, as they showed less correspondence with the expression profiles from alternate tissues (**Figure 2C**).

76 To provide context for the statistical performance of DEcode, we contrast it to a high-performing method called  
77 ExPecto<sup>11</sup>, as it was designed to predict GTEX gene expression from epigenetic states, estimated from promoter  
78 sequences via DL. We built 10 models for each method using the same genes for training, validation, and testing to

79 predict gene expression in the 53 tissues. In this comparison, DEcode showed an average of 7.2% improvement in root  
80 mean square error over ExPecto (**Figure 2D**) which translates into an average correlation coefficient with actual gene  
81 expression of 0.42 - a 50% increase over 0.28 from ExPecto (**Figure S2**).

82 Beyond the predictive performance of DEcode, we utilize the model to help define the biological processes regulating  
83 DE. Many studies have demonstrated that TFs-promoter interactions are critical determinants of transcriptional activity  
84 of promoter and thereby define gene expression levels<sup>2</sup>. However, it is unclear to what extent RNA features, which we  
85 define as each RNA's binding sites of proteins and miRNA's, contribute to gene expression levels compared to TFs-  
86 promoter interactions. To answer this question, we re-trained the deep learning model, randomizing either RNA features,  
87 promoter features, or both. We found that RNA features alone explained the actual TPM values better than the model  
88 trained with promoter features (**Figure 2E**). An example of how RNA features may distinguish between transcripts to a  
89 greater extent than promoter features can be seen in the structure of the gene ACADM (**Figure 2F**), which showed  
90 substantial differences between the promoter-based model and the RNA-based model. For instance, the promoter-based  
91 model could not distinguish 8 out of 11 transcripts coding for the ACADM gene that shared the same promoter region  
92 (p1 in **Figure 2F**). However, the actual expression levels for the 8 transcripts varied depending on the mRNA structures  
93 and therefore were more accurately captured by the RNA-based model (**Figure 2F**). However, the importance of RNA  
94 features was tissue-dependent (**Figure 2G**), as gene expression in the aorta and coronary arteries were mainly defined by  
95 TF-promoter interactions, whereas RNA-binding features were the major predictors for thyroid-specific or skeletal  
96 muscle-specific expression.

97

## 98 **Regulatory factors for differential expression across human tissues**

99 To quantify the importance of the biological interactions weighted in the DEcode models, we calculated DeepLIFT  
100 scores, which are a measure of the additive contribution of its binding site to each prediction<sup>14, 15</sup> and then averaged the  
101 DeepLIFT scores for each interactor across genes (**Table S2**). Because DeepLIFT scores for the gene-based model and  
102 the transcript-based model were well correlated (Spearman's rho = 0.52,  $P < 2.2e-16$ ) (**Figure S3**), we focused on  
103 DeepLIFT scores for the gene-based model in the following analyses. For the prediction of median TPM levels, the  
104 enrichment of the binding sites of RNABPs peaked among the top 12% of influential predictors, which was significantly  
105 greater than the influence of TFs and miRNAs ( $P < 0.00001$ ) (**Figure 3A**). Indeed, out of the top 30 key predictors, 19  
106 were RNABP's binding sites and 11 were TF binding sites. The direction of DeepLIFT scores indicates either a positive

107 or a negative effect of having the binding site on the abundance of RNA (**Figure 3B**). For instance, the binding sites of  
108 ATXN2, DDX3X, and FUS had high positive DeepLIFT scores to the prediction of RNA abundance, indicating the  
109 RNAs that bear binding sites for these RNABPs tended to be more highly expressed (**Figure 3B**). We also calculated  
110 DeepLIFT scores for tissue-specific expression to examine critical predictors for each of 53 tissues (**Figure 3C**). The  
111 DeepLIFT scores across tissues recapitulated the contribution of binding sites of known master regulators in each tissue  
112 such as REST for brain tissues<sup>16</sup>, SPI1 and RUNX1 for immune-related tissues<sup>17</sup>, TP63 and KLF4 for skin<sup>18</sup>, HNF4A  
113 for liver<sup>19</sup>, and PPARG for adipose-related tissues<sup>20</sup>, which suggested the differences in predictive contributions of  
114 binding sites of a given regulator reflect the differential activities of regulators across tissues. We hypothesized that the  
115 differential activities of a regulator could be in part explained by the relative abundance of a regulator across tissues.  
116 Based on this hypothesis, we contrasted DeepLIFT scores for the binding sites of each regulatory factor and its expression  
117 levels across tissues. We indeed found that 99 RNABPs and 410 TFs showed significant correlations between DeepLIFT  
118 scores of their binding sites and their expression levels (FDR < 5%) (**Figure S4**). These relationships were not based on  
119 differences in expression profiles between brain and non-brain tissues, as the relationships remained the same without  
120 brain tissues (**Figure S5**). The sign of the correlation possibly reflects whether the binding of a regulator to RNA  
121 increased or decreased the abundance of the RNA. For instance, the model suggested that PPARG and PTBP1 are positive  
122 regulators of gene expression as DeepLIFT scores of PPARG or PTBP1 binding sites were higher in the tissues expressing  
123 PPARG or PTBP1 at higher levels (**Figure 3D**). Indeed, PPARG is a transcriptional activator<sup>20</sup> and PTBP1 is a stabilizer  
124 of RNAs<sup>21</sup>. Conversely, the expression levels of REST, a transcriptional repressor<sup>16</sup>, or METTL14, an RNA  
125 methyltransferase destabilizing RNAs<sup>22</sup>, showed inverse correlations with their DeepLIFT scores as expected (**Figure**  
126 **3D**). These results indicated that DEcode reflects biological mechanisms for controlling RNA abundance.

127

### 128 **Critical predictors of transcriptome are enriched for disease genes.**

129 Next, we characterized the roles of the critical regulators of human transcriptome, as suggested by the DEcode models  
130 (**Figure 3A**). We hypothesized that if these are truly impactful transcriptome regulators, then defects in such regulators  
131 would have significant impacts on cellular phenotypes and thereby lead to disease. To examine this hypothesis, first, we  
132 obtained genes whose loss-of-function (LoF) mutations are depleted through the process of natural selection, from the  
133 Exome Aggregation Consortium (ExAC)<sup>23</sup>. Since these genes are intolerant to LoF mutations they are considered to play  
134 important roles in individual fitness. Out of all TFs and RNABPs used in DEcode, 853 genes were examined in the ExAC

135 study and 601 genes were reported as being intolerant of homozygous or heterozygous LoF mutations, with probability  
136 greater than 99%. We found that these LoF-mutation-intolerant regulators had greater DeepLIFT score magnitudes for  
137 the prediction of the absolute gene expression (**Figure 3E** and **Table S3**). In particular, these associations are based on  
138 genes that are intolerant to both heterozygous and homozygous LoF mutations (**Figure S6**). This suggested that having  
139 LoF mutations only in a single allele of the predicted critical regulators would cause a deleterious consequence on survival  
140 or reproduction in humans. Next, to examine whether the predicted critical regulators of transcriptome indeed cause  
141 diseases, we obtained disease-causing genes registered in the Online Mendelian Inheritance in Man (OMIM)<sup>24</sup>. We  
142 confirmed that mutations in the regulators with high DeepLIFT scores tended to cause genetic disorders (**Figure 3E**).  
143 Interestingly, their roles on fitness are likely preserved across species, as dysfunctions of the predicted critical regulators  
144 also led pre-weaning lethality in mice (**Figure 3E**). Lastly, we asked whether the loss-of-function of the predicted critical  
145 regulators of the transcriptome could also impair cellular viability, by overlapping them with loss-of-function screens for  
146 a range of cellular models, from the Cancer Dependency Map project (DepMap)<sup>31</sup>. We found that the key genes for  
147 cellular viability tended to have higher DeepLIFT scores in the DEcode model (**Figure 3E**). These results were robust,  
148 as they were also supported by the DeepLIFT scores for the transcript-level model (**Figure S7**). Together, the results  
149 indicated that the critical predictors of transcriptome indeed play critical roles in maintaining vital cellular and body  
150 functions. Thus the DEcode model can identify disease-causing genes, and this capability points toward the broader  
151 validity of predicted key regulators.

152

### 153 **DEcode predicts differential expression across individuals**

154 Next, we asked whether the same input of promoter and RNA features could also predict relative expression differences  
155 across individuals within the same tissue. We hypothesized that each individual has different activation levels of  
156 regulatory factors, and thus those differences lead to person-specific differential expression of their targets. To verify our  
157 hypothesis, we extended the DEcode framework to model differential expression across individuals for 14 representative  
158 tissues with a sample size greater than 100 in GTEX. This was challenging as the average variance in gene expression  
159 within tissues was less than 25% of that between tissues (**Figure S8**).

160 To generate person-specific predictions, we utilized transfer learning, wherein the parameters in convolutional layers in  
161 the across-tissue DEcode model were fixed and then only the parameters in the fully-connected layers were tuned (**Figure**  
162 **S9**). The person-specific models successfully predicted fold changes across individuals with a mean Spearman's

163 correlation of  $\sim 0.28$  (**Figure 4A**). The performance was further increased to 0.34 when we filtered out the models that  
164 worked poorly for the validation data (**Figure S10**). Note the model selection was performed based on validation data  
165 alone, and all the follow-up performance evaluations and analyses were conducted by using testing data to prevent  
166 information leaks that could inflate model performance (**Figure S9**). The models were indeed person-specific as they did  
167 not predict gene expression profiles of unrelated individuals (**Figure 4A**). To examine if the model captured the person-  
168 specific expression shared across tissues<sup>25</sup>, we compared expression between tissues within the same individuals and  
169 between different individuals. The predicted expression showed better concordance between tissues from the same  
170 individuals, as is the case with actual expression data, which indicated the model captured the person-specific regulatory  
171 mechanisms, even though we did not use any direct information that could identify individuals (**Figure 4B**).

172 Next, to gauge the contribution of RNA and promoter features to the person-specific expression profiles, we re-trained  
173 models with randomized RNA features, promoter features, or both. The RNA-feature-based model performed on average  
174 85% as well as the model trained with all features. This corresponded to an average 173% performance gain, compared  
175 to the promoter-feature-based model, which suggested that the post-transcriptional controls are the major determinants  
176 of the differential expression across individuals (**Figure 4C**). The model also allowed us to investigate the person-specific  
177 activities of regulators by calculating DeepLIFT scores (**Figure 4D**). At least 100 of regulators out of 933 regulators in  
178 each tissue showed a good correlation between their DeepLIFT scores and expression levels across individuals (**Figure**  
179 **S11**). The signs of these correlations were consistent between tissues, and consistent with those of the cross-tissue model  
180 (**Figure S12**). This suggested that differential expression between individuals and between tissues can be modeled by the  
181 universal relationships between regulators and their targets.

182 To examine whether specific genes contributed to the per-person accuracy of the predicted gene expression, we also  
183 assessed its accuracy on a per-gene basis. The predicted expression of a majority of the testing genes (78% on average)  
184 showed significant positive correlations with the actual gene expression (FDR<5%). In order to assess whether this  
185 predictive performance outperformed a state of the art method, we compared DEcode with PrediXcan<sup>26</sup>, which predicts  
186 person-specific gene expression from genetic variations in cis-regulatory regions of genes. We built PrediXcan models  
187 for each of the testing genes based on the same GTEX gene expression data used for the DEcode models and whole-  
188 genome sequence data of corresponding individuals (see Methods). The PrediXcan model predicted gene expression  
189 levels of only about 11% of the testing genes at FDR less than 5%, which was far less than that of DEcode (**Figure 4E**).

190 This suggested that the differential activity of transcriptional and post-transcriptional regulators has a larger effect on  
191 gene expression than genetic variations in cis-regulatory regions.

192 The genes that DEcode could predict well were similar across tissues (**Figure S13**). This suggested that the predictability  
193 of gene expression is defined by gene characteristics rather than a target tissue. We, therefore, explored gene  
194 characteristics that were associated with the per-gene accuracy of the predicted expression. We found that the models  
195 showed higher performance for the genes that are registered in multiple gene annotation databases than those found only  
196 in the GENCODE database (**Figure S14**). The GENCODE-specific genes are novel or putative and thus their annotations  
197 are not well established. Since both actual gene expression and binding features in RNA and promoter regions are likely  
198 to be less accurate for such a novel or putative gene, it is reasonable that the performance of the model for those genes  
199 was lower than other well-established genes. Beyond the annotation reliability, we found that the number of known  
200 binding features for each gene had a larger effect on the predictability (**Figure S15**). This suggested that the more  
201 information on RNA and promoter interactions is available, the more the prediction becomes accurate. Interestingly, the  
202 number of binding features in RNAs was a stronger determinant of the predictive accuracy than that in promoter regions  
203 (**Figure 4F** and **Figure S15**). RNA-protein interactions are largely missing as global RNA-binding profiles are available  
204 for only about 10% of known RNABPs<sup>30</sup>. Thus, the incompleteness of RNA features is likely to be an origin of lower  
205 accuracy for a portion of genes.

206

### 207 **DEcode predicts trait-related transcriptomic changes**

208 Next, we asked whether the person-specific expression profiles predicted by the DEcode models also retained trait-  
209 associated differential expression changes. For this, we conducted differential expression analysis against the donor's  
210 age and sex using the predicted gene expression data. Notably, test statistics of the predicted data showed significant  
211 positive correlations with those of the actual data in all tissues for both traits (**Figure 5A**). Especially, age- and sex-  
212 specific expression changes were well preserved in the predicted data in lung (Spearman's rho = 0.59,  $P < 2.2e-16$ ) and  
213 hippocampus (Spearman's rho = 0.47,  $P < 2.2e-16$ ), respectively. The predicted associations were the closest to those of  
214 corresponding tissues in 9 and 11 out of 14 tissues for age and sex, respectively (**Figure 5B**). This indicated that the  
215 predicted gene expression changes against age and sex are tissue-specific in most cases, rather than the effects shared  
216 across tissues. We also explored the regulators for the age- and sex-related gene expression changes by associating  
217 regulator's DeepLIFT scores with age and sex. We found that many regulators, for instance, 717 in the tibial artery and



218 904 in the breast mammary tissue, showed age- and sex-dependent changes at FDR 5%, respectively (**Figure 5C and**  
219 **Table S4**), which showed the capability of DEcode to associate transcriptional regulators with phenotypes. Although  
220 there were more TFs associated with phenotypes than RNABPs and miRNAs, overall collective impacts of RNA features  
221 on the generative process of DEs for age and sex were greater than those of promoter features in most tissues (**Figure**  
222 **S16**).

223

#### 224 **DEcode predicts gene co-expression relationships**

225 Co-expression analysis is a frequent component of transcriptome studies as gene-to-gene co-expression relationships are  
226 regarded as functional units of the transcriptional system<sup>27</sup>. Therefore, we examined if the DEcode models could detect  
227 known gene co-expression relationships. These tests were both a potential validation of the person-specific DEcode  
228 predictions, and a means to explore the biological basis of co-expression. We found that the gene co-expression  
229 relationships in the predicted gene expression profiles separated gene pairs with positive and negative correlation in the  
230 actual gene expression data in each tissue (**Figure 6A**). Furthermore, the predicted gene expression profiles also detected  
231 inter-tissue co-expression relationships (**Figure 6B**). The accuracy of these results motivated us to investigate key factors  
232 driving co-expression, via the DEcode predictions. RNA features alone could explain co-expression relationships better  
233 than promoter features in most tissues (**Figure 6C**), which again suggested the significant contribution of RNA features  
234 to person-specific transcriptomes.

235 To further assess the capability of DEcode to decipher the mechanisms leading a specific co-expression relationship, we  
236 focused on the co-expression of *LAPTM5* and *CD53*, which were robustly co-expressed both in the simulated expression  
237 data and the actual data in all tissues except whole-blood. Using the trained model, we simulated the consequences of  
238 disruptions of promoter and mRNA features. The co-expression relationship was weakened when the features near  
239 transcriptional start site (TSS) and 1,000 bp downstream of TSS in *LAPTM5* or near TSS and 500 bp upstream of TSS in  
240 *CD53* were removed (**Figure 6D**). These observed effects were reasonable because many TFs bind to these regions  
241 (**Figure 6D**). We further examined the specific regulators for the co-expression relationships by simulating knockout  
242 (KO) effects of regulators. The *in-silico* KO experiments revealed that immune-related TFs such as *SPI1* and *TBX21*  
243 potentiated the co-expression relationships consistently across multiple tissues (**Figure 6E**). To validate if these  
244 regulators indeed induced the co-expression relationships, we conducted a mediation analysis that is an orthogonal  
245 computational method to infer the effect of regulators on downstream targets. A mediation analysis evaluated the

246 hypothesis where if *LAPTM5* and *CD53* are co-expressed due to the predicted regulators, normalizing expression levels  
247 of the two genes by the expression levels of the regulators would decrease the co-expression relationships. Specifically,  
248 it quantified the covariance between *LAPTM5* and *CD53* explained by the expression levels of the predicted regulators  
249 using the actual expression data. The set of the 10 regulators together mediated up to 94% of covariance, which was  
250 significantly greater than the same number of randomly picked regulators (**Figure 6F**). This example showed the utility  
251 of DEcode framework to identify the drivers of the co-expression.

252

### 253 **DEcode reveals molecular regulations for frequently DE genes in meta-transcriptomes**

254 A recent meta-analysis of over 600 human transcriptome data revealed that some genes are more likely to be detected as  
255 DE genes than others in diverse case-control studies<sup>28</sup>. From this observation, Megan et al. formulated the “DE prior”, a  
256 global ranking of gene’s generic likelihood of being DE. The genes with high DE prior rank were significantly more  
257 enriched with DE genes from a variety of conditions, as compared to other functional gene sets, such as those contained  
258 in gene ontology or canonical pathways<sup>28</sup>. However, the regulatory-origin behind the ranking of these highly responsive  
259 genes has yet to be uncovered. Therefore, we used DEcode to examine whether the DE prior rank could be generated by  
260 gene regulatory interactions, and to identify critical regulatory relationships for frequently DE genes. The ability of  
261 DEcode to predict global DE prior ranks was highly significant ( $P < 2.2e-16$ ) and practically relevant (Spearman’s rho =  
262 0.53) (**Figure 7A**). Furthermore, DEcode was able to identify genes with high (90th percentile and greater) DE prior  
263 probability (AUCROC = 0.81, 95% confidence interval = 0.78 - 0.84) (**Figure 7B**). Re-training the model with  
264 randomized inputs indicated that TF-promoter interactions were the major factors explaining the DE prior rank (**Figure**  
265 **7B**). To further characterize TFs that contributed to the prediction, we defined TFs with DeepLIFT score greater than  
266 90th percentile as critical TFs (**Table S5**) and performed pathway analysis on them. We found that critical TFs were  
267 enriched for cancer or inflammatory-related KEGG pathways (FDR<5%) such as pathways in cancer (Fold = 3.1,  $P =$   
268 4.2e-5), JAK-STAT signaling pathway (Fold = 6.8,  $P = 4.8e-5$ ), chemokine signaling pathway (Fold = 7.3,  $P = 1.4e-4$ ),  
269 and acute myeloid leukemia (Fold = 4.5,  $P = 3.6e-4$ ) (**Table S6**). This result is consistent with the disease-related data  
270 context for DE prior, which is 62% cancer-related and 23% inflammatory-related. Supported by the ability to predict DE  
271 prior ranks, and by the consistency of these results, this application of DEcode illustrates how it goes beyond DE gene  
272 lists, to uncover major key drivers for generating DE.

273 In summary, DEcode defines major principles in gene regulation in arbitrary gene expression data. It is applicable to  
274 tracing the origins of complex gene expression patterns such as co-regulation, and also to arbitrary gene expression  
275 signatures. This capacity is strongly supported on a comparative basis to alternative methods, and on an absolute basis  
276 across diverse applications, which include, through predictions of transcript-usage, person-specific gene expression,  
277 frequently DE genes of multiple external disease-related gene sets.

## 278 Discussion

279 We introduced the DEcode framework, which integrates a wealth of genomic data into a unified computational model of  
280 transcriptome regulations to predict multiple transcriptional effects, including the absolute expression differences across  
281 genes and transcripts, tissue- and person-specific transcriptomes. Systems biology analysis of these results provided  
282 biological insights regarding the regulatory mechanisms of transcriptome. For instance, it suggested that absolute  
283 expression levels are mainly under post-transcriptional control, whereas tissue-specific expression is shaped by both  
284 transcriptional and post-transcriptional control. This implied that TFs act as a switch that initiates tissue-specific  
285 transcriptional programs, but once a gene is transcribed at a certain level, its abundance in the cells will be primarily  
286 regulated by RNABPs. The post-transcriptional regulators were also critical for explaining individual differences in  
287 transcriptomes and thus may fine-tune the transcriptome in response to environmental and genetic factors.

288 Transcriptome analysis often identifies differentially expressed genes and then assesses the enrichment of functional  
289 genes such as TF-targets one by one. The person-specific DEcode model offers several comparative advantages. First,  
290 DEcode can take into account the effects of multiple regulators simultaneously as opposed to one at a time. Second,  
291 DEcode can estimate the person-specific regulator's activities that can be used to identify regulators associated with a  
292 phenotype of interest. Third, DEcode can simulate the consequence of KO perturbations for each gene. This step can  
293 reduce the number of candidate key drivers of gene expression changes by an order of magnitude or more, and facilitates  
294 the design of follow-up experiments. Therefore, DEcode can extract more actionable information from transcriptome  
295 data, which will benefit a variety of transcriptome studies.

296 Looking toward even more expansive applications, the DEcode framework has the flexibility to incorporate other types  
297 of genomic information such as DNA methylation, histone marks, and RNA modifications, and also can be extended to  
298 other organisms. Thus, DEcode framework provides a direct bridge between accumulating genomic big data and

299 individual transcriptome studies, allowing researchers to predict molecules that control DE associated with any condition  
300 or disease.

## 301 Materials and Methods

### 302 Transcriptome data processing

303 To prepare gene expression data used for the model training, we downloaded the median gene TPM from 53 human  
304 tissues from the v7 release of GTEX portal (<https://gtexportal.org>). We kept 27,428 genes expressed greater than two  
305 TPM in at least one tissue and log<sub>2</sub>-transformed TPM with the addition of 0.25 to avoid a negative infinity. Then, we  
306 calculated the median log<sub>2</sub>-TPM across 53 tissues and log<sub>2</sub>-fold-changes relative to the median of all tissues. The  
307 processed gene-level expression data comprised 27,428 genes with 54 columns including relative fold-changes for 53  
308 tissues and the median log<sub>2</sub>-TPM across 53 tissues. To compile transcript-level data, we downloaded the individual-  
309 level transcript TPM from the GTEX portal and computed the median transcript TPM by tissue. We processed the  
310 transcript data in the same way we did for the gene-level data. The resulted transcript-level data included 79,647  
311 transcripts that corresponded to 23,813 genes. For building person-specific DEcode models, we obtained the gene-level  
312 TPM for each individual in 14 tissues from the GTEX portal. We filtered out lowly-expressed genes in each tissue and  
313 kept genes expressed greater than one TPM in at least 50% of samples. Then, we log<sub>2</sub>-transformed TPM with the  
314 addition of 0.25 and then quantile normalized the log<sub>2</sub>-TPM. Finally, we removed the effects of technical covariates  
315 including rRNA rate, intronic rate, and RIN number via linear regression for each gene followed by quantile  
316 normalization.

### 317 Promoter and RNA binding features.

318 To generate RNA and DNA feature matrices, we downloaded genomic locations of binding sites of 171 RNABPs from  
319 POSTAR<sup>29</sup> as of Oct 2018, 218 miRNAs from TargetScan Release 7.2<sup>30</sup>, and 826 TFs from GTRD<sup>31</sup> as of Oct 2018.  
320 Then, we mapped the binding sites of RNABPs, miRNAs, and TFs to promoters and RNA-coding regions defined in  
321 the GTF file provided by the GTEX portal. A promoter region of each gene was defined as the region from 2,000 bp  
322 upstream of the transcriptional start site (TSS) to 1,000bp downstream of the TSS. We only used interactors that bind to

323 promoters or RNA-coding regions of at least 30 genes, or transcripts as the predictors in each model. To reduce the size  
324 of the input, an RNA-coding region and a promoter region of each gene was binned with 100 bp intervals and the  
325 number of bases bound to each RNABP, miRNA, or TF was counted in each interval. This step generated RNA and  
326 DNA feature matrices for each gene described in **Figure 1**.

### 327 Training tissue-specific models

328 For training the gene-level model of tissue-specific expression, we reserved all 2,705 genes coded on chromosome 1 as  
329 the testing data and the rest of the genes was randomly split into training data (22,251 genes) and validation data (2,472  
330 genes). In the case of the transcript model, we used all 7,631 transcripts coded on chromosome 1 as the testing data and  
331 the rest of the transcripts was randomly split into training data (64,978 transcripts) and validation data (7,038  
332 transcripts). The binding matrices were normalized by the maximum values for each binding protein and miRNA. The  
333 relative fold-changes for 53 tissues were scaled together to set the standard deviation as one and the median log<sub>2</sub>-TPM  
334 was separately scaled to set the standard deviation as one. These steps were conducted for the training data first and  
335 then the same scaling factors were used for the validation and the testing data to avoid information leaking from those  
336 data. We constructed and trained DL models using Keras (version 2.1.3)<sup>32</sup> with a TensorFlow (version 1.4.1)<sup>33</sup>  
337 backend. Hyper-parameters were optimized using hyperopt (version 0.2)<sup>34</sup> based on the mean squared error against the  
338 validation data. The detailed structure of the model was described in **Figure S17**. The training was done using mini-  
339 batches of 128 training examples with a learning rate of 0.001 for Adam optimizer<sup>35</sup>. The number of maximum training  
340 epochs was set to 100 with early-stopping of 10 based on validation loss. This training cycle was repeated 10 times and  
341 the best model for the validation data was selected as the final model (**Figure S1**). All models were trained using  
342 TITAN X Pascal graphics processing units (Nvidia).

### 343 Comparison of DEcode with ExPecto

344 To perform a fair comparison between DEcode and ExPecto<sup>11</sup>, we used 18,550 genes that were commonly included in  
345 both studies and trained models with the same set of genes for training and evaluation. Since ExPecto model was  
346 originally built using genes on chromosome 8 as the testing data, we followed the same procedure as we reserved all  
347 714 genes coded on chromosome 8 as the testing data and the rest of the genes was randomly split into training data  
348 (16,052 genes) and validation data (1784 genes). The epigenetic states estimated by ExPecto were downloaded from

349 the ExPecto repository (<https://github.com/FunctionLab/ExPecto>) as of Nov 2019. Given the epigenetic states, we built  
350 a prediction model for tissue-specific gene expression for each tissue via XGBoost based on the training script  
351 downloaded from the ExPecto repository. We modified the original script so that the early stopping of the model  
352 optimization was decided based on the performance on the validation data instead of the testing data. This modification  
353 prevented the overfitting of the model to the testing data. We used the same hyper-parameters for XGBoost as in the  
354 script. Both hyper-parameters and model parameters of DEcode model were also trained with the same set of training,  
355 validation, and testing genes.

### 356 DeepLIFT score calculation

357 To evaluate the importance of input features to the prediction, we calculated DeepLIFT (Deep SHAP) scores<sup>14</sup> using  
358 DeepExplainer implementation (version 0.27.0)<sup>15</sup>. The DeepLIFT method estimates the contribution of each input  
359 compared to a reference input in a trained DL model. To compute the contribution of the presence of a binding site, we  
360 used a reference that does not have any binding sites in both promoters and RNAs with the median length of all genes  
361 in the testing data. DeepLIFT scores follow a summation-to-delta property where the summation of input contributions  
362 (DeepLIFT scores) is equal to the difference in the predicted value compared to the prediction from the reference input.  
363 We calculated DeepLIFT scores for each gene in testing data for each of 54 outputs, then summed up the scores over  
364 promoter or RNA regions for each feature, and finally averaged them over genes.

### 365 Disease genes

366 The probability that a gene is intolerant for a loss-of-function mutation was downloaded from the release 1.0 of the  
367 ExAC portal (<http://exac.broadinstitute.org>). Disease genes were obtained from the OMIM portal as of June 2019  
368 (<https://www.omim.org/>). We excluded provisional gene-to-phenotype associations and genes associated with non-  
369 disease phenotypes, multifactorial disorders, or infection. We obtained mouse-lethal genes from Gene Discovery  
370 Informatics Toolkit (v1.0.0)<sup>36</sup> that provided pre-processed gene lists from the murine knock-out experiments registered  
371 in Mouse genome informatics (MGI)<sup>37</sup> and the International Mouse Phenotyping Consortium (IMPC)<sup>38</sup>. The results of  
372 CRISPR screening for the genes essential for proliferation or viability conducted in the DepMap project<sup>39</sup> were  
373 downloaded from Enrichr portal<sup>40, 41</sup> as of June 2019 (<https://amp.pharm.mssm.edu/Enrichr>). Enrichr portal provided  
374 two CRISPR screening results conducted independently at Broad Institute and the Sanger Institute. To reduce the false

375 positives in the CRISPR screening, we used essential genes that were identified in both of the two independent  
376 screenings.

### 377 Training person-specific models

378 To train person-specific models, we utilized the same model structure as the tissue-model, except that the number of  
379 model outputs was modified to match the sample size of the tissue. We re-used the parameters of convolutional layers  
380 in the tissue-model and only parameters in the fully-connected layers were tuned (**Figure S9**). We used the same gene  
381 splits and the same procedure of normalization and scaling as the tissue-model for training and evaluating models. We  
382 evaluated the model prediction for each individual separately based on validation data and filtered out the individual  
383 models that performed less than 50% percentile of all individual models for some analyses (**Figure S9**).

### 384 Training PrediXcan models

385 To build a prediction model for gene expression from genotype data, we trained PrediXcan<sup>26</sup> models with GTEx gene  
386 expression and genotype data. A QCed vcf file of GTEx genotype data called by whole-genome sequence was  
387 downloaded from dbGaP for 635 individuals. We filtered out variants with a missing rate greater than 1% and minor  
388 allele frequency less than 1% and kept 9,219,660 variants for PrediXcan. We followed the model building procedure  
389 employed in PredictDB (<http://predictdb.org/>), a repository of PrediXcan models, as of Nov 2019. Briefly, we  
390 randomly split the samples into 5 folds. Then for each fold, we removed the fold from the data and used the remaining  
391 data to train an elastic-net model using 10-fold cross-validation to tune the lambda parameter. With the trained model,  
392 we predicted gene expression values for the hold out samples. We applied the PrediXcan method to predict the same  
393 gene expression data used for the person-specific DEcode models. We built PrediXcan model for each gene using  
394 variants located within 1 Mbp upstream and downstream of its TSS. A missing value of the genotype data was replaced  
395 with an average dosage of non-missing samples.

### 396 Differential expression analysis for age and sex

397 Limma<sup>42</sup> was used to identify genes associated with age using gender as a covariate. The log<sub>2</sub>-TPM values of genes in  
398 the testing data were used. We also tested the associations between DeepLIFT scores for predictors and age via limma

399 to identify regulators for DE against ages and sex. The Benjamini–Hochberg procedure was used to control the false  
400 discovery rate at 5%.

#### 401 *in silico* binding-site disruption experiment

402 To simulate the consequence of the removal of binding sites on the expression of *LAPTM5* and *CD53*, we generated  
403 10,000 synthetic inputs for each of *LAPTM5* and *CD53* where all binding sites in each interval of its promoter and  
404 RNA were randomly removed. From each of these synthetic inputs, we computed predicted expression values and  
405 correlated them with ones of another gene without any disruptions in its binding sites. Then, we used multiple linear  
406 regression to associate the location of disrupted regions with the correlation values between *LAPTM5* and *CD53* to  
407 estimate the effects of the disruption in each region on the co-expression relationship.

#### 408 *in silico* knockout experiment

409 To simulate the effect of regulator knockout (KO) on the expression of *LAPTM5* and *CD53*, we generated 10,000  
410 synthetic inputs for each *LAPTM5* and *CD53* where each protein or miRNA bound to its promoter or RNA was  
411 randomly removed from its feature matrices. From each of these synthetic inputs, we computed predicted expression  
412 values and correlated them with ones of another gene without any removals in its feature matrices. Then, we used  
413 multiple linear regression to associate KOs of regulators with the correlation values between *LAPTM5* and *CD53* to  
414 estimate the effects of the KO of each regulator on the co-expression relationship. We applied the Bonferroni correction  
415 to control multiple testing and the regulators with the corrected p-value less than 0.05 in all tissues were chosen as the  
416 key drivers of the co-expression.

#### 417 Conditional independence test

418 To validate the effect of the predicted drivers on co-expression, we conducted a conditional independence test. We  
419 regressed the actual log<sub>2</sub>-TPM values of *LAPTM5* and *CD53* with the actual log<sub>2</sub>-TPM values of the predicted drivers  
420 and computed R<sup>2</sup> (variance explained) between the residuals of two genes. The R<sup>2</sup> based on the actual gene expression  
421 and one from the residuals were compared to quantify the covariance explained by the predicted drivers. To evaluate  
422 the significance of this effect, we repeated this process 1,000 times with an equal number of randomly picked genes  
423 that have a binding site in *LAPTM5* or *CD53* as regressors.



## 424 DEcode model for DE prior rank

425 DE prior rank was downloaded from <https://github.com/maggiecrow/DEprior>. In the DE prior rank, each gene has a  
426 probability-like value where zero is the minimum and one is the maximum. To convert this value to a non-bounded  
427 scale, we applied the logit transformation to the DE prior value. We assigned a value of 10 to a gene that had an infinite  
428 value after the logit transformation. We used the same gene splits as the GTEx-tissue-model, which resulted in 13,433  
429 genes for training, 1,504 genes for validation, and 1,674 genes for testing. We trained the DEcode model for DE prior  
430 rank using the same procedure as with the GTEx-person-specific models. To evaluate the contribution of promoter and  
431 RNA features to the prediction, the model was also trained with randomized input features. Receiver operating  
432 characteristic (ROC) curve analysis was performed using pROC R package<sup>43</sup> with a default setting. We performed  
433 pathway analysis of the TFs with a DeepLIFT score greater than 90th percentile using KEGG pathways<sup>44</sup>. KEGG  
434 pathway gene sets were downloaded from MSigDB v6.1<sup>45</sup>. The enrichment significance was based on results of the  
435 hypergeometric test, with 757 unique TF genes as a background, against KEGG pathways comprised of at least 5  
436 background genes. FDR was controlled at 5%. We manually curated the 159 disease-related data sets used in the  
437 construction of the DE prior ranking, to determine the number of data sets related to cancer or inflammatory disease.

## 438 Code and model availability

439 DEcode software and pre-trained models for tissue- and person-specific transcriptomes are available at  
440 [www.differentialexpression.org](http://www.differentialexpression.org).

## 441 Acknowledgments

442 We thank Dr. Lei Yu for managing access to GTEx data. The study was supported by NIH grants P30AG010161,  
443 R01AG061798, and R01AG057911. The Genotype-Tissue Expression (GTEx) Project was supported by the Common  
444 Fund of the Office of the Director of the National Institutes of Health, and by NCI, NHGRI, NHLBI, NIDA, NIMH, and  
445 NINDS. The data used for the analyses described in this manuscript were obtained from the GTEx Portal on 10/01/2018.

## 446 Author Contributions

447 ST contributed to the conception and design of the study. ST performed the computational analysis. ST, CG, SM, and  
448 YW interpreted the result. ST wrote the first draft of the manuscript. All authors contributed to manuscript revision, read  
449 and approved the submitted version.

## 450 References

- 451 1. Lee, T. I. & Young, R. a. Transcriptional regulation and its misregulation in disease. *Cell* **152**, 1237-51 (2013).
- 452 2. Lambert, S. A. *et al.* The Human Transcription Factors. *Cell* **172**, 650-665 (2018).
- 453 3. Glisovic, T., Bachorik, J. L., Yong, J. & Dreyfuss, G. RNA-binding proteins and post-transcriptional gene  
454 regulation. *FEBS letters* **582**, 1977-86 (2008).
- 455 4. Bartel, D. P. MicroRNAs: target recognition and regulatory functions. *Cell* **136**, 215-33 (2009).
- 456 5. Schoenfelder, S. & Fraser, P. Long-range enhancer-promoter contacts in gene expression control. *Nature reviews.*  
457 *Genetics* **20**, 437-455 (2019).
- 458 6. Smith, Z. D. & Meissner, A. DNA methylation: roles in mammalian development. *Nature reviews. Genetics* **14**, 204-  
459 20 (2013).
- 460 7. Roundtree, I. A., Evans, M. E., Pan, T. & He, C. Dynamic RNA Modifications in Gene Expression Regulation. *Cell*  
461 **169**, 1187-1200 (2017).
- 462 8. Avsec, Ž *et al.* The Kipoi repository accelerates community exchange and reuse of predictive models for genomics.  
463 *Nature biotechnology* **37**, 592-600 (2019).
- 464 9. Libbrecht, M. W. & Noble, W. S. Machine learning applications in genetics and genomics. *Nature reviews. Genetics*  
465 **16**, 321-32 (2015).
- 466 10. Jaganathan, K. *et al.* Predicting Splicing from Primary Sequence with Deep Learning. *Cell* **176**, 535-548.e24  
467 (2019).
- 468 11. Zhou, J. *et al.* Deep learning sequence-based ab initio prediction of variant effects on expression and disease risk.  
469 *Nature genetics* **50**, 1171-1179 (2018).
- 470 12. Alipanahi, B., DeLong, A., Weirauch, M. T. & Frey, B. J. Predicting the sequence specificities of DNA- and RNA-

- 471 binding proteins by deep learning. *Nature biotechnology* **33**, 831-8 (2015).
- 472 13. Melé, M. *et al.* Human genomics. The human transcriptome across tissues and individuals. *Science (New York,*  
473 *N.Y.)* **348**, 660-5 (2015).
- 474 14. Shrikumar, A., Greenside, P. & Kundaje, A. Learning Important Features Through Propagating Activation  
475 Differences. (2017).
- 476 15. Lundberg, S. M. & Lee, S. A Unified Approach to Interpreting Model Predictions. , 4765-4774 (2017).
- 477 16. Chong, J. A. *et al.* REST: a mammalian silencer protein that restricts sodium channel gene expression to neurons.  
478 *Cell* **80**, 949-57 (1995).
- 479 17. Imperato, M. R., Cauchy, P., Obier, N. & Bonifer, C. The RUNX1-PU.1 axis in the control of hematopoiesis.  
480 *International journal of hematology* **101**, 319-29 (2015).
- 481 18. Soares, E. & Zhou, H. Master regulatory role of p63 in epidermal development and disease. *Cellular and molecular*  
482 *life sciences : CMLS* **75**, 1179-1190 (2018).
- 483 19. Watt, A. J., Garrison, W. D. & Duncan, S. A. HNF4: a central regulator of hepatocyte differentiation and function.  
484 *Hepatology (Baltimore, Md.)* **37**, 1249-53 (2003).
- 485 20. Lefterova, M. I., Haakonsson, A. K., Lazar, M. A. & Mandrup, S. PPAR $\gamma$  and the global map of adipogenesis and  
486 beyond. *Trends in endocrinology and metabolism: TEM* **25**, 293-302 (2014).
- 487 21. Ge, Z., Quek, B. L., Beemon, K. L. & Hogg, J. R. Polypyrimidine tract binding protein 1 protects mRNAs from  
488 recognition by the nonsense-mediated mRNA decay pathway. *eLife* **5** (2016).
- 489 22. Wang, Y. *et al.* N6-methyladenosine modification destabilizes developmental regulators in embryonic stem cells.  
490 *Nature Cell Biology* **16**, 191-198 (2014).
- 491 23. Lek, M. *et al.* Analysis of protein-coding genetic variation in 60,706 humans. *Nature* **536**, 285-91 (2016).
- 492 24. Online Mendelian Inheritance in Man, OMIM®. McKusick-Nathans Institute of Genetic Medicine, Johns Hopkins  
493 University (Baltimore, MD), {June 11th, 2019}. World Wide Web URL: <https://omim.org/>.
- 494 25. Ardlie, K. G. *et al.* The Genotype-Tissue Expression (GTEx) pilot analysis: Multitissue gene regulation in humans.  
495 *Science* **348**, 648-660 (2015).
- 496 26. Gamazon, E. R. *et al.* A gene-based association method for mapping traits using reference transcriptome data.  
497 *Nature genetics* **47**, 1091-8 (2015).
- 498 27. Gaiteri, C., Ding, Y., French, B., Tseng, G. C. & Sibille, E. Beyond modules and hubs: the potential of gene

- 499 coexpression networks for investigating molecular mechanisms of complex brain disorders. *Genes, brain, and behavior*  
500 **13**, 13-24 (2014).
- 501 28. Crow, M., Lim, N., Ballouz, S., Pavlidis, P. & Gillis, J. Predictability of human differential gene expression. *Proc.*  
502 *Natl. Acad. Sci. U. S. A.* **116**, 6491-6500 (2019).
- 503 29. Zhu, Y. *et al.* POSTAR2: deciphering the post-transcriptional regulatory logics. *Nucleic acids research* **47**, D203-  
504 D211 (2019).
- 505 30. Agarwal, V., Bell, G. W., Nam, J. & Bartel, D. P. Predicting effective microRNA target sites in mammalian  
506 mRNAs. *eLife* **4** (2015).
- 507 31. Yevshin, I., Sharipov, R., Valeev, T., Kel, A. & Kolpakov, F. GTRD: a database of transcription factor binding  
508 sites identified by CHIP-seq experiments. *Nucleic acids research* **45**, D61-D67 (2017).
- 509 32. Chollet, F. keras. *GitHub repository* <https://github.com> (2015).
- 510 33. Abadi, M. *et al.* TensorFlow: Large-Scale Machine Learning on Heterogeneous Distributed Systems. (2016).
- 511 34. Bergstra, J., Komer, B., Eliasmith, C., Yamins, D. & Cox, D. D. Hyperopt: a Python library for model selection and  
512 hyperparameter optimization. *Computational Science & Discovery* **8**, 014008 (2015).
- 513 35. Kingma, D. P. & Ba, L. J. *Adam: A Method for Stochastic Optimization*, arXiv.org, 2015).
- 514 36. Dawes, R., Lek, M. & Cooper, S. T. Gene discovery informatics toolkit defines candidate genes for unexplained  
515 infertility and prenatal or infantile mortality. *NPJ genomic medicine* **4**, 8-11 (2019).
- 516 37. Smith, C. L., Blake, J. A., Kadin, J. A., Richardson, J. E. & Bult, C. J. Mouse Genome Database (MGD)-2018:  
517 knowledgebase for the laboratory mouse. *Nucleic Acids Res.* **46**, D836-D842 (2018).
- 518 38. Koscielny, G. *et al.* The International Mouse Phenotyping Consortium Web Portal, a unified point of access for  
519 knockout mice and related phenotyping data. *Nucleic Acids Res.* **42**, 802 (2014).
- 520 39. Tsherniak, A. *et al.* Defining a Cancer Dependency Map. *Cell* **170**, 564-576.e16 (2017).
- 521 40. Kuleshov, M. V. *et al.* Enrichr: a comprehensive gene set enrichment analysis web server 2016 update. *Nucleic*  
522 *acids research* **44**, 90 (2016).
- 523 41. Chen, E. Y. *et al.* Enrichr: interactive and collaborative HTML5 gene list enrichment analysis tool. *BMC*  
524 *Bioinformatics* **14**, 128 (2013).
- 525 42. Ritchie, M. E. *et al.* limma powers differential expression analyses for RNA-sequencing and microarray studies.  
526 *Nucleic acids research* **43**, e47 (2015).

- 527 43. Robin, X. *et al.* pROC: an open-source package for R and S+ to analyze and compare ROC curves. *BMC*  
 528 *Bioinformatics* **12**, 77 (2011).  
 529 44. Kanehisa, M. & Goto, S. KEGG: kyoto encyclopedia of genes and genomes. *Nucleic Acids Res.* **28**, 27-30 (2000).  
 530 45. Liberzon, A. *et al.* The Molecular Signatures Database (MSigDB) hallmark gene set collection. *Cell systems* **1**, 417-  
 531 425 (2015).

## 532 Figure legends

### Figure 1

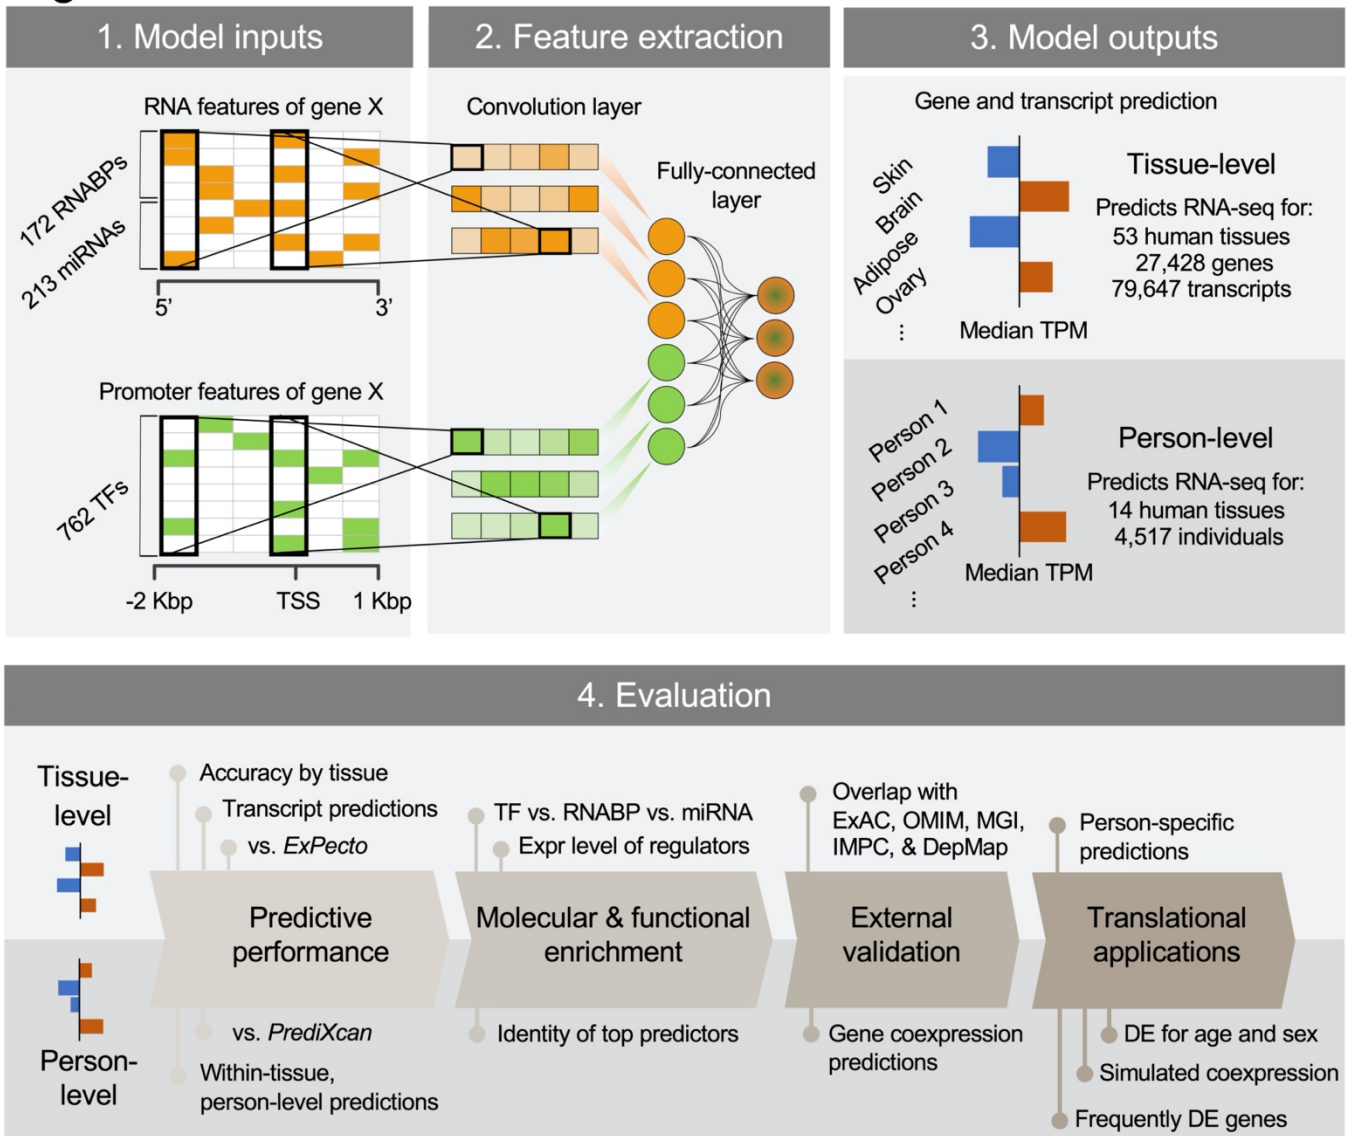

533

534 **Figure 1.** Overview of building and evaluating the DEcode transcriptome prediction model.

## Figure 2

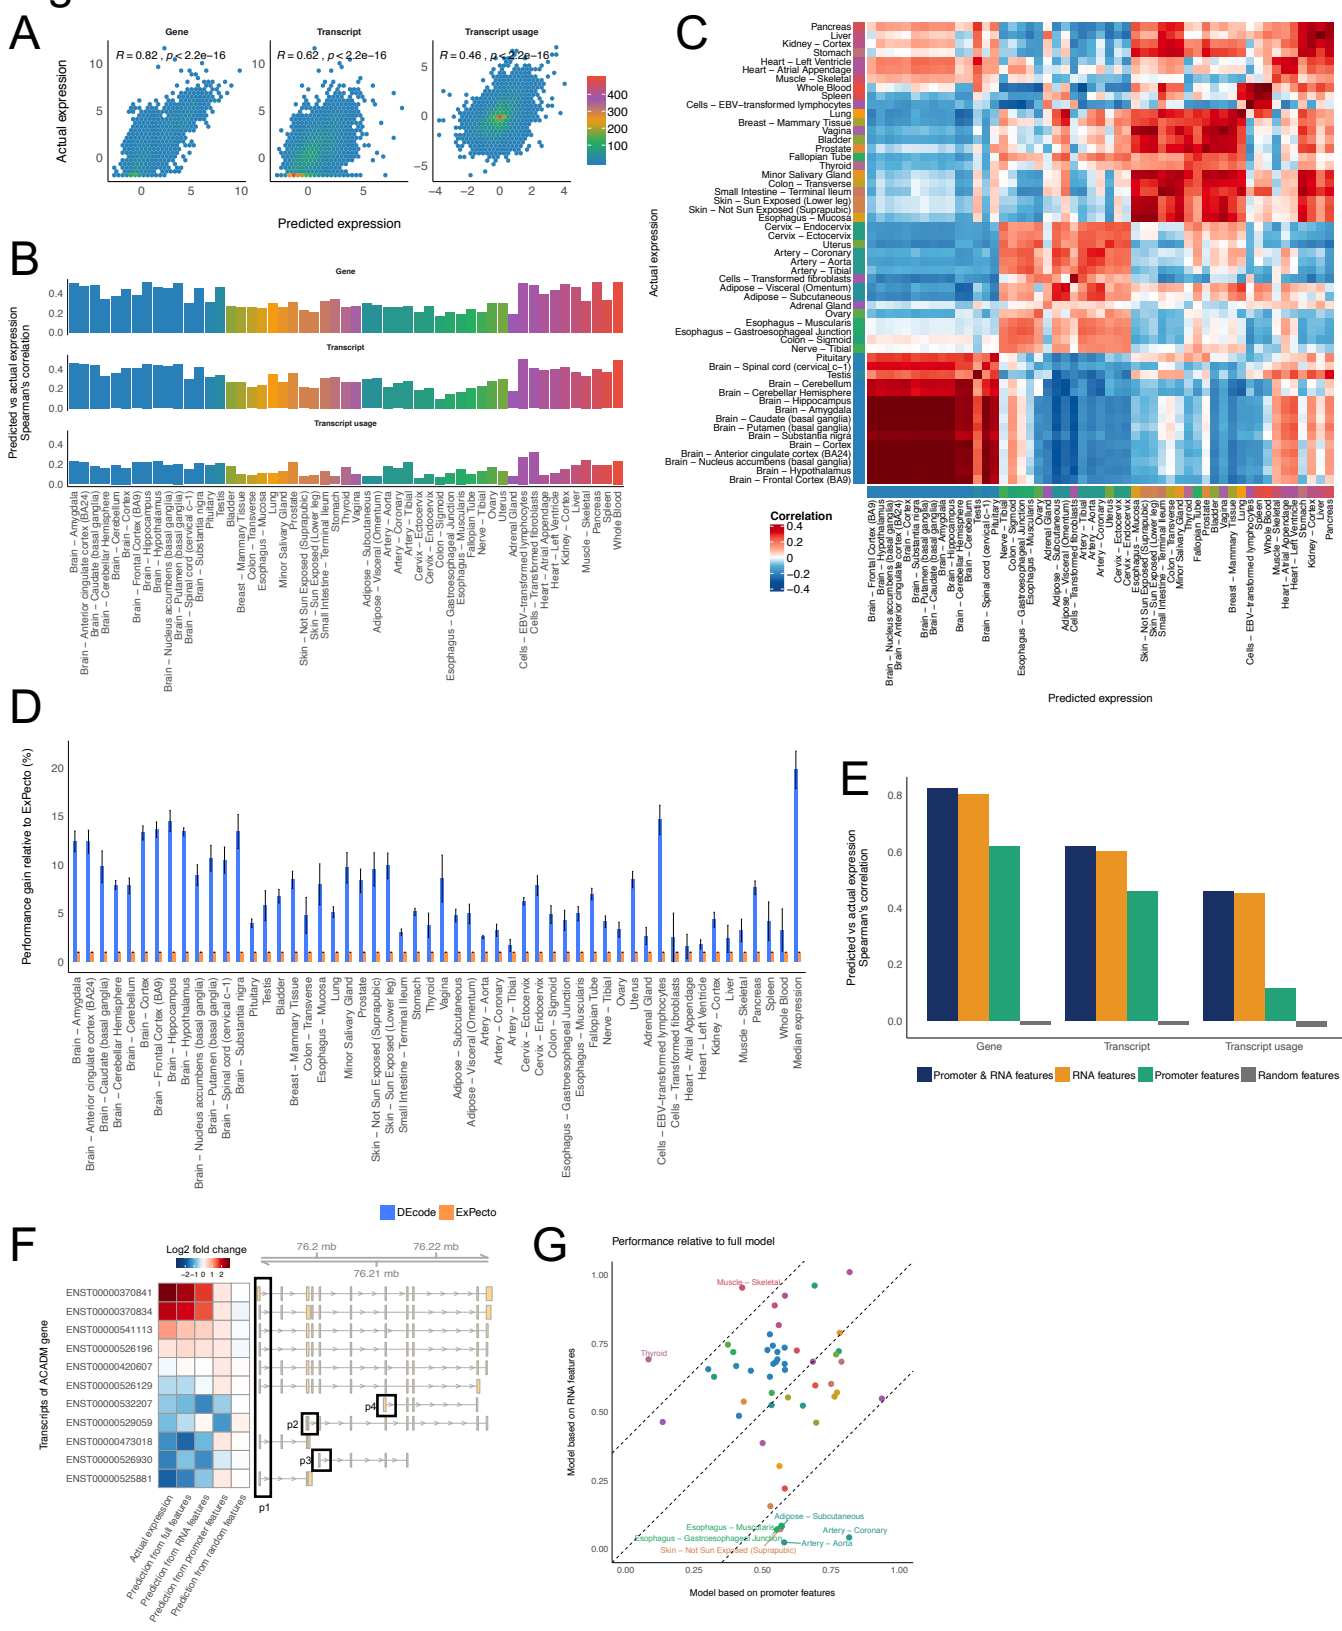

535

536 **Figure 2.** Performance of the tissue-level models. (A) Prediction performances on the median absolute expression levels

537 across tissues. The predicted the log<sub>2</sub>-TPM values for 2,705 genes or 7,631 transcripts coded on chromosome 1 were

538 compared with the actual median log<sub>2</sub>-TPMs across 53 tissues using Spearman's rank correlation. The transcript usage  
539 within each gene was computed by subtracting the mean log<sub>2</sub>-TPM from log<sub>2</sub>-TPM of transcripts in each gene for 1,485  
540 genes that had multiple transcripts. **(B)** Prediction performances on the tissue-specific expression profiles. The predicted  
541 fold changes relative to the median of all tissues for 2,705 genes or 7,631 transcripts coded on chromosome 1 were  
542 compared with the actual fold changes in each tissue using Spearman's rank correlation. The differences in the transcript  
543 usage within each across tissues were computed for 1,485 genes that had multiple transcripts. The color of the bar  
544 indicated the tissue groups based on the similarity of gene expression profiles. **(C)** The heatmap showing pairwise  
545 correlations between the predicted and the actual tissue-specific expression profiles of 53 tissues for the testing genes.  
546 **(D)** Performance comparison of DEcode with ExPecto. The root-mean-square errors (RMSE) of DEcode models for  
547 expression-levels of 714 genes coded on chromosome 8 was compared with those of ExPecto. Each method was executed  
548 10 times. The median RMSE of the 10 runs was displayed as a bar plot and the error bar represents median absolute  
549 deviation. **(E)** The predictive performances of the models trained with a different set of features. **(F)** The comparison of  
550 the expression levels for ACADM transcripts predicted by the models trained with different feature sets. **(G)** The  
551 predictive performances on the tissue-specific gene expression profiles of the testing data relative to the model trained  
552 with a full set of features.

## Figure 3

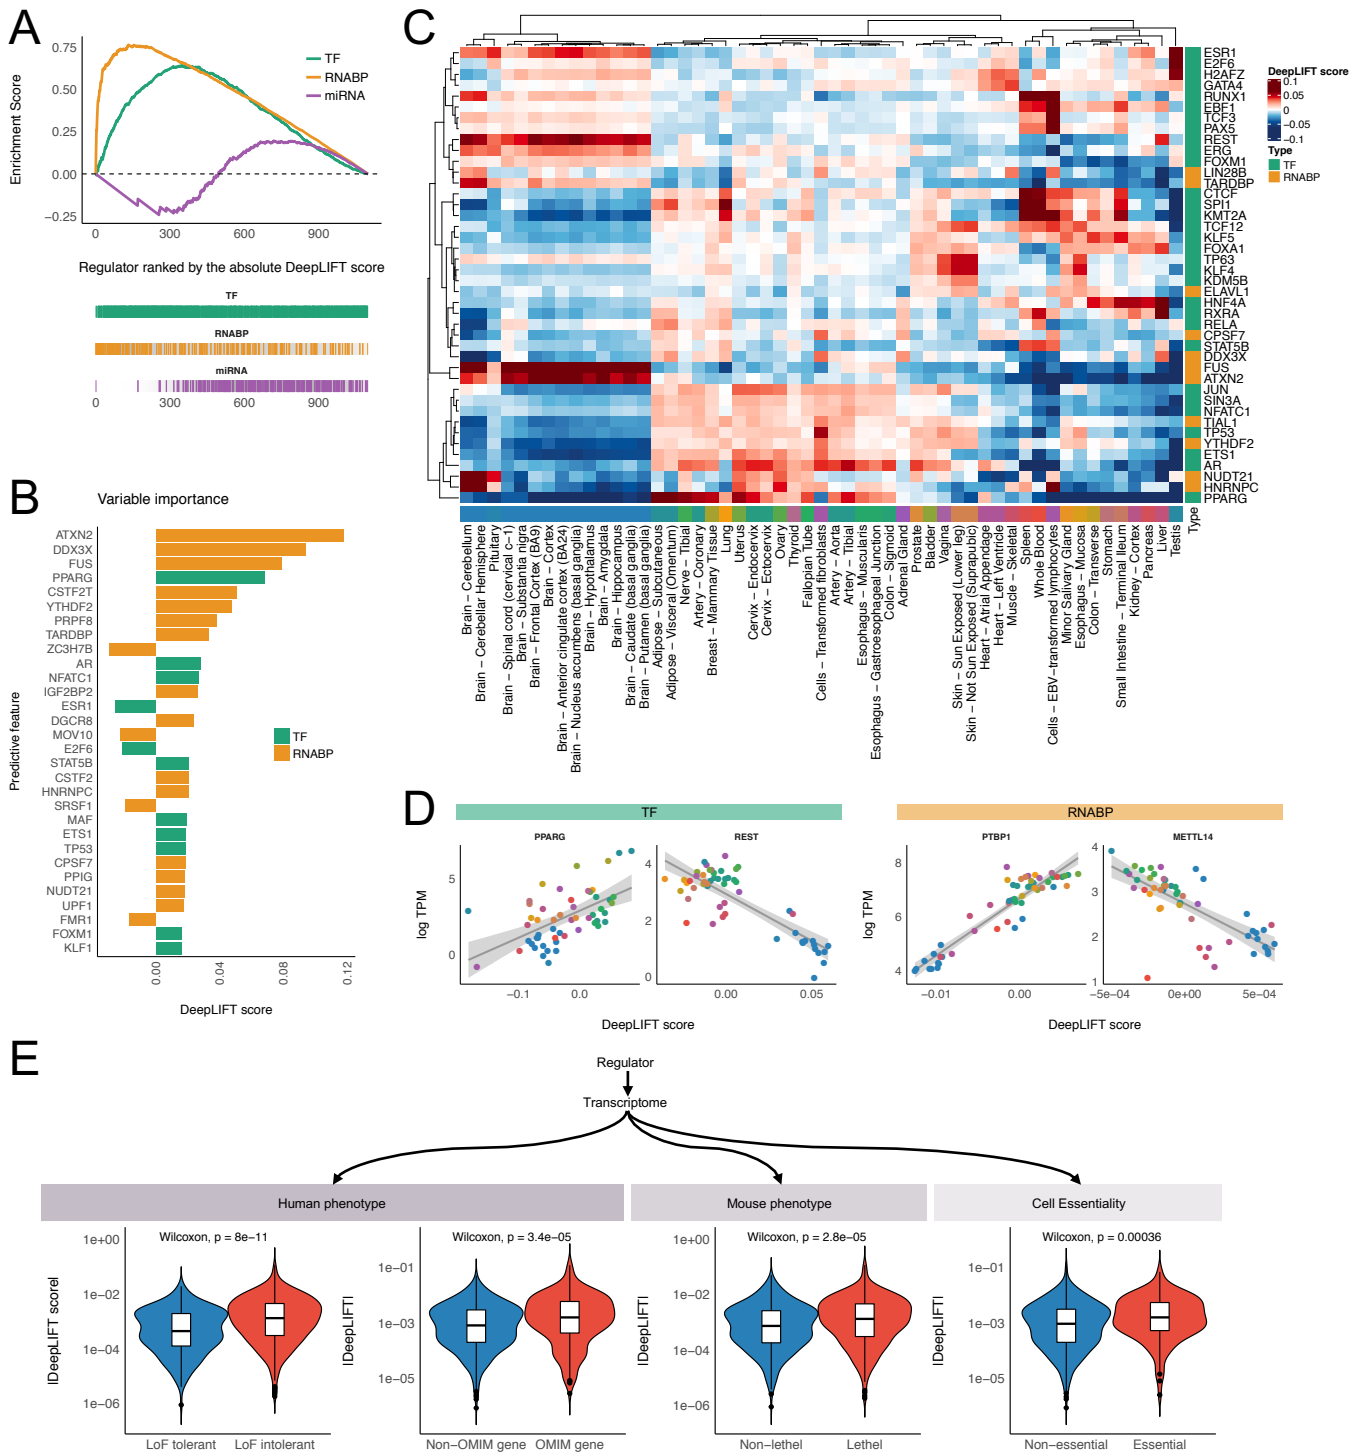

553

554 **Figure 3.** Identification and characterization of key predictors in the tissue-level models. (A) The enrichment of a  
 555 regulator class in the key predictors for the median absolute expression levels. We ranked the regulators by the DeepLIFT  
 556 scores and evaluated the enrichment of each regulator class. We used the pre-ranked gene set enrichment analysis (GSEA)  
 557 algorithm with 10,000 permutations to compute enrichment scores and statistical significance. (B) Top 30 key predictors



558 for the median absolute expression levels. **(C)** Key predictive regulators for the tissue-specific transcriptomes. We  
559 selected the top 5 key predictors for each tissue and their DeepLIFT scores were displayed as a heatmap. The ward  
560 linkage method with the Euclidean distance was used to cluster tissues and predictors. **(D)** Example relationships between  
561 the predictive importance for a regulator and its expression levels across tissues. **(E)** The overlap between the key  
562 regulators for the median absolute expression levels and external functional gene sets.

## Figure 4

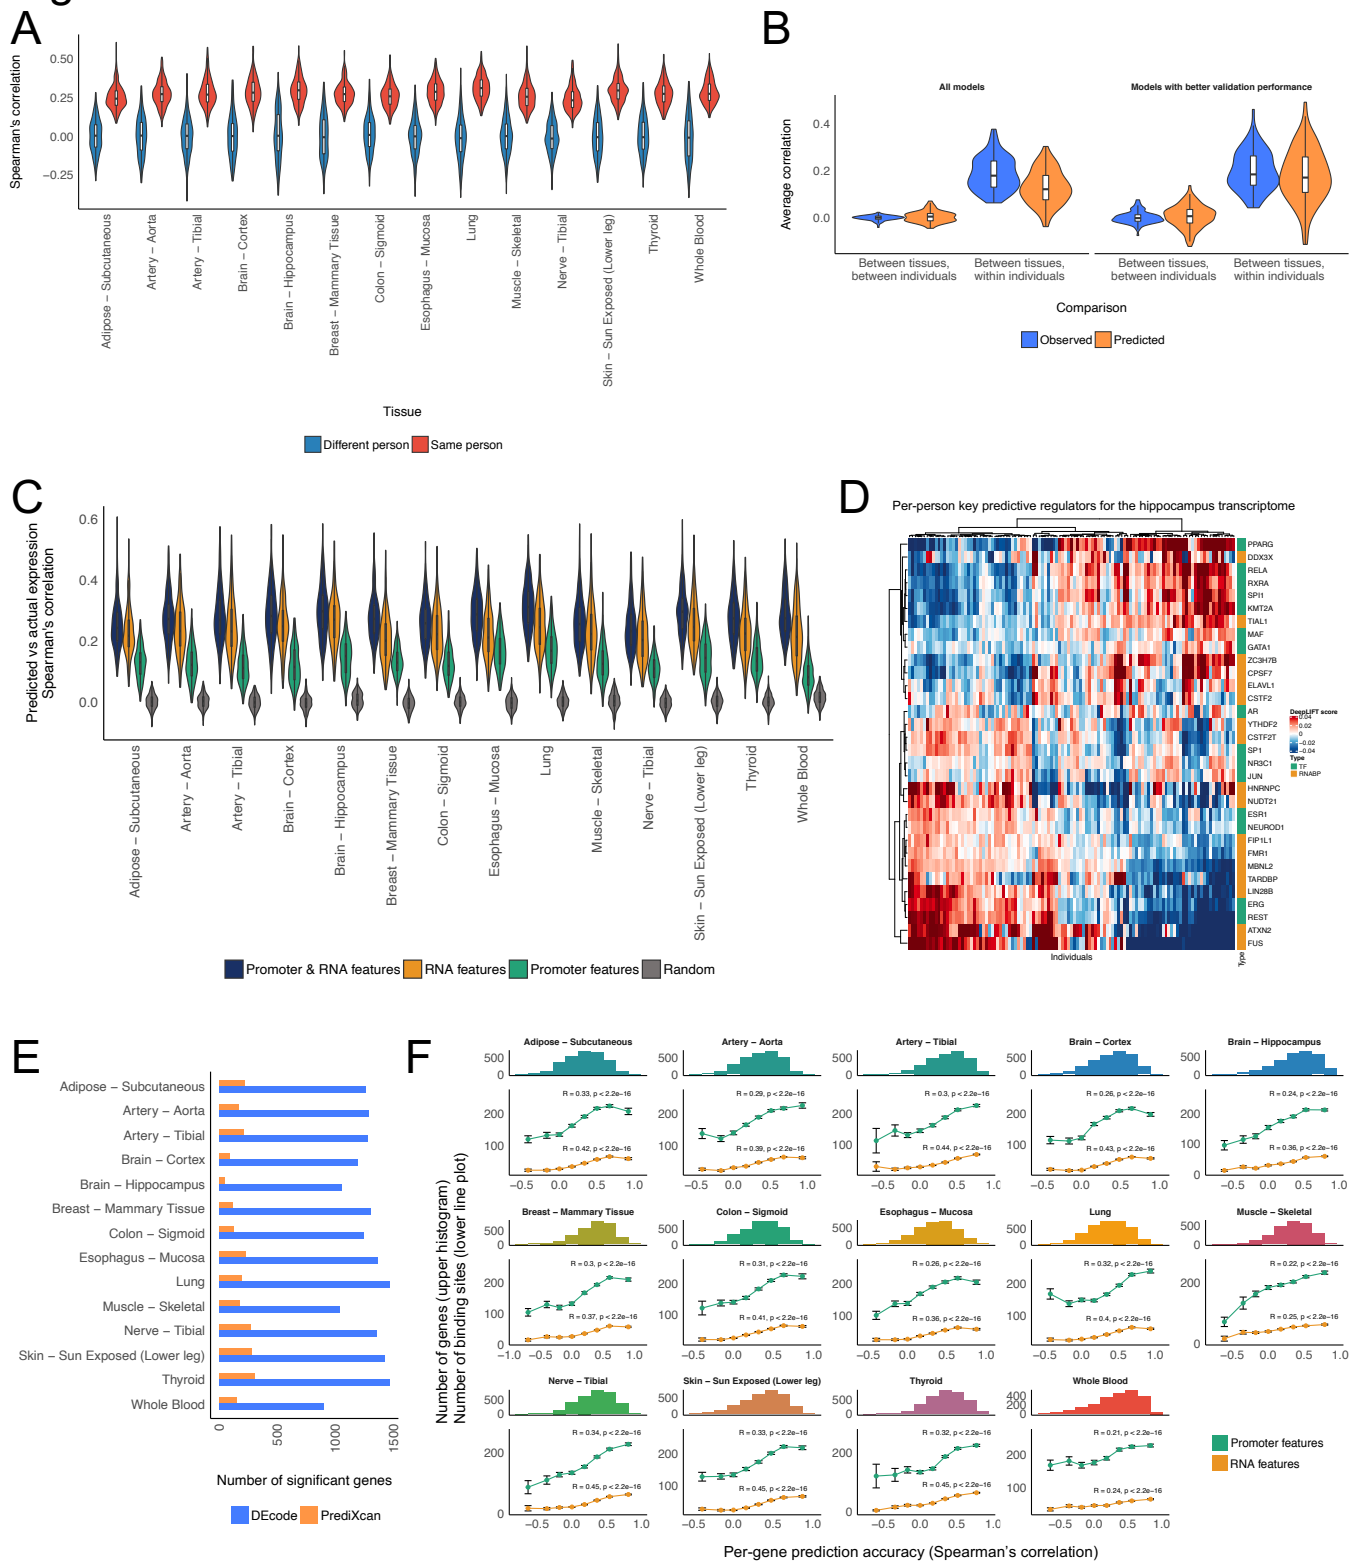

563

564 **Figure 4.** Performance of the person-specific models. (A) The predictive performances of the person-specific models for  
 565 the actual data from the same individuals and unrelated random individuals. (B) The person-specific models predicted  
 566 person-specific expression shared across tissues. (C) The performances of the models trained with a distinct feature set.

26

567 **(D)** Per-person key predictive regulators for the hippocampus transcriptome. We selected the top 5 key predictors of the  
568 hippocampus transcriptome for each individual and their DeepLIFT scores were displayed as a heatmap. The ward  
569 linkage method with the Euclidean distance was used to cluster tissues and predictors. **(E)** Comparison of per-gene  
570 predictive accuracy between DEcode and PrediXcan. The number of genes that showed a positive Pearson's correlation  
571 between predicted and actual gene expression levels at FDR 5% was calculated for each method. Only the testing genes  
572 on chromosome 1 were used for this comparison. **(F)** Per-gene prediction accuracy is associated with the number of  
573 features present in RNAs and promoters. The histogram represents Pearson's correlations between the predicted and the  
574 actual expression for each gene. The line plot shows the average number of RNA and promoter features of genes in each  
575 bin of the histogram. Spearman's correlation between the number of features and per-gene correlations is displayed in  
576 the line plot. The error bars indicate standard errors.

## Figure 5

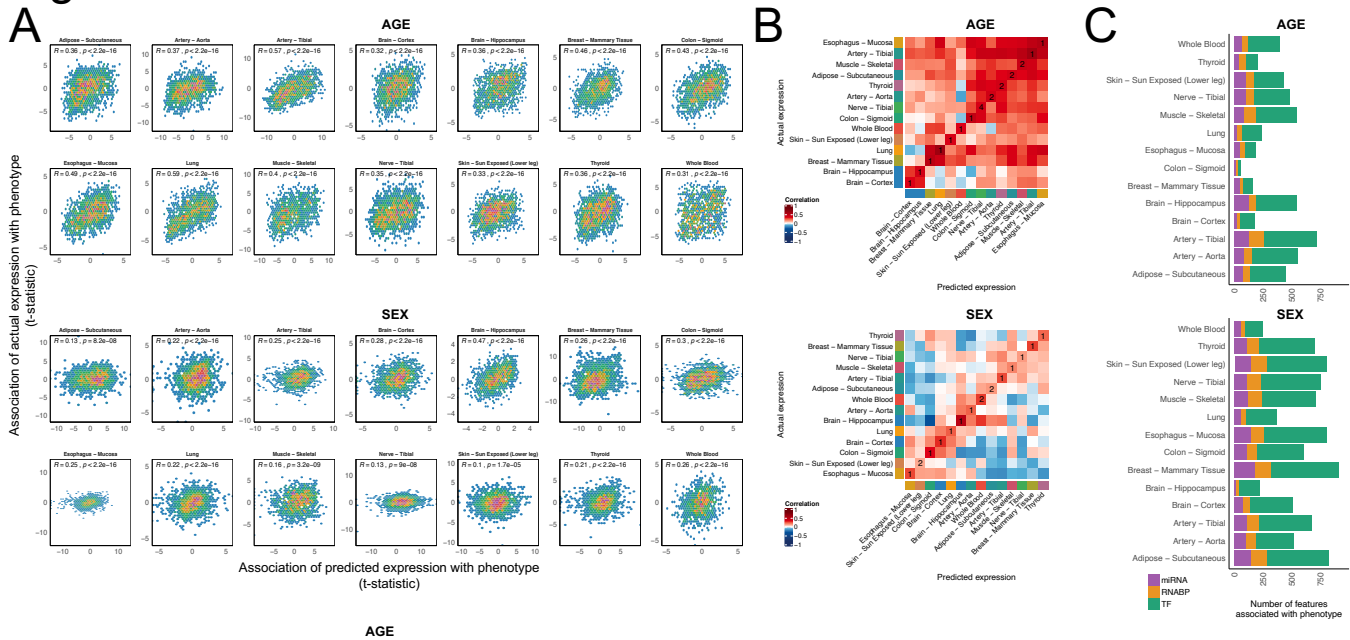

577

578 **Figure 5.** Application of the person-specific models to analyze phenotype-related gene signatures. (A) The scatter plots  
 579 showing the relations between the associations of genes with age and sex using predicted expression and those using the  
 580 actual expression. Spearman's correlation between t-statistics using the predicted and the actual gene expression is  
 581 displayed in the scatter plot. (B) The pairwise Spearman's correlations between the predicted and the actual associations  
 582 of genes with age and sex in all tissues. The numbers in diagonal elements of the heatmap indicate the ranks of similarity  
 583 of the predictions with the actual observations in the corresponding tissues. (C) The regulators whose DeepLIFT scores  
 584 were associated with age and sex. The Benjamini–Hochberg procedure was used to control the false discovery rate at 5%  
 585 for each phenotype.

## Figure 6

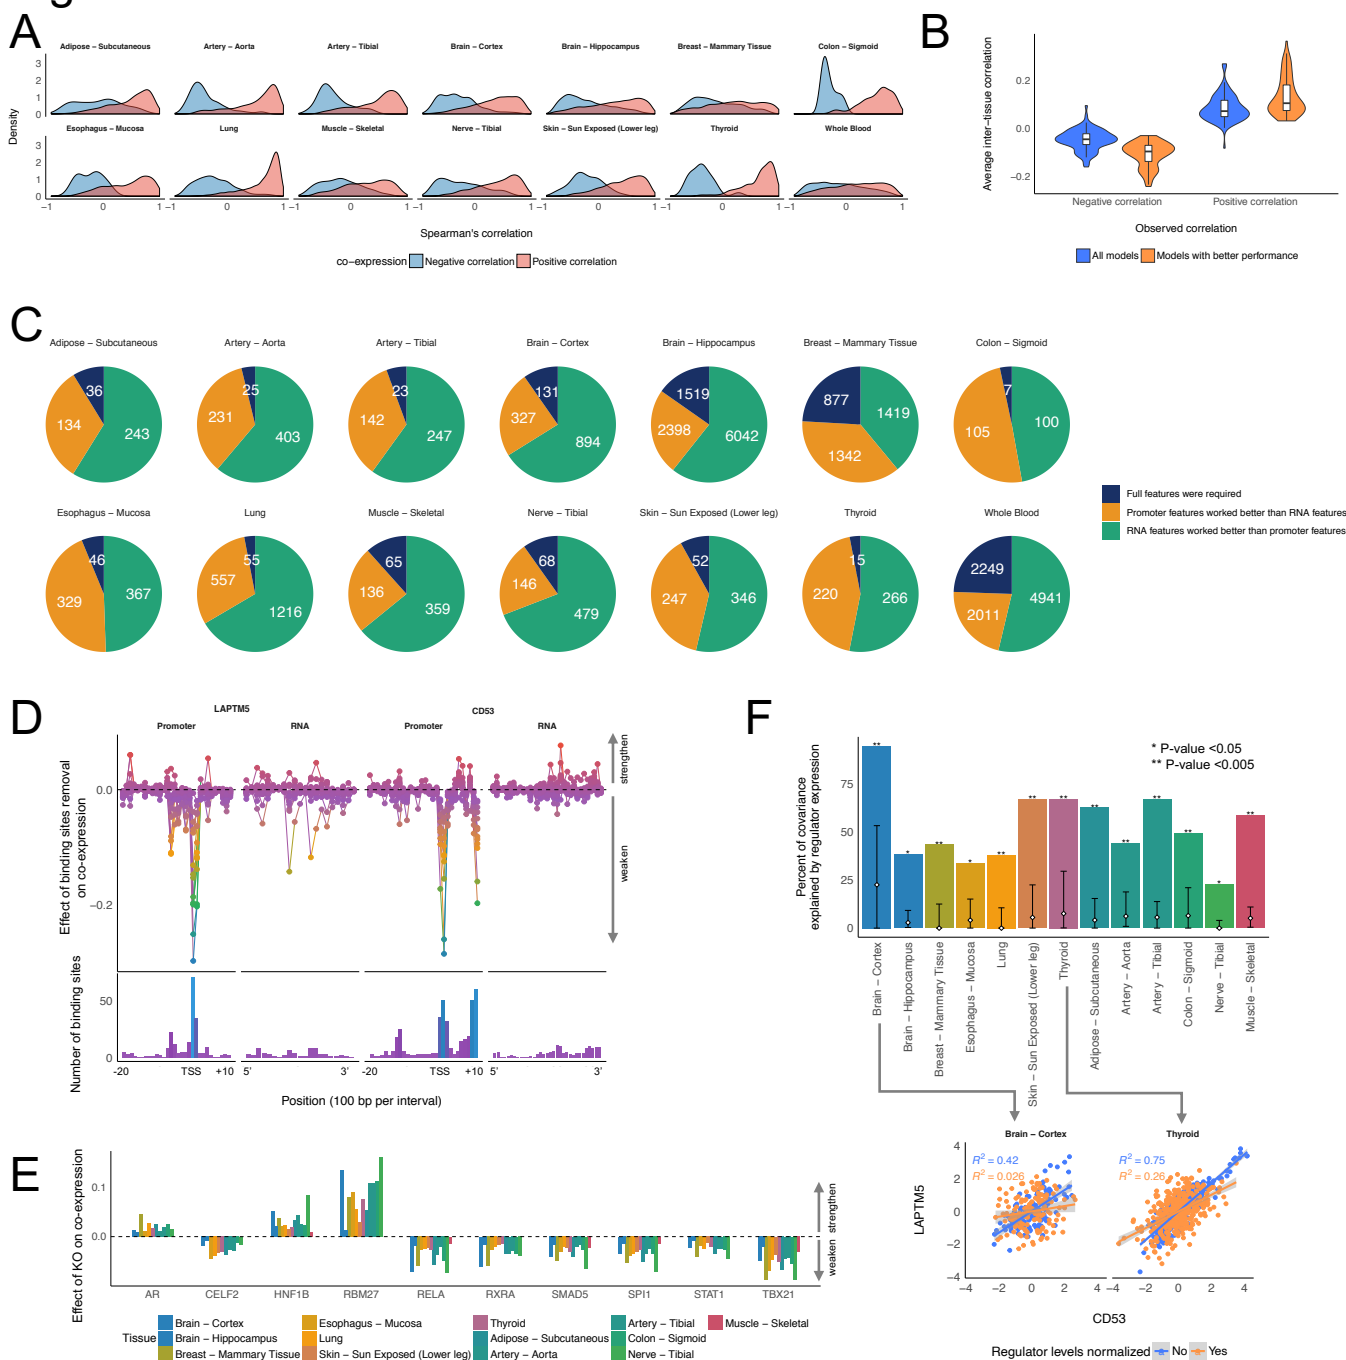

586

587 **Figure 6.** Application of the person-specific models to investigate gene co-expression. (A) Co-expression relationships  
 588 in the predicted gene expression. We defined the ground truth co-expression relationships as gene pairs with the absolute  
 589 Spearman's correlation greater than 0.7 in the actual expression of the testing data. The density of Spearman's correlation  
 590 between the co-expressed gene pairs in the predicted gene expression data was estimated using the density function in R  
 591 with the Gaussian kernel. (B) Inter-tissue gene co-expression relationships in the predicted gene expression. We defined  
 592 the ground truth co-expression relationships as gene pairs with the absolute Spearman's correlation greater than 0.5 in

593 the actual expression of the testing data. We computed the average of Spearman's correlation of the inter-tissue co-  
594 expressed gene pairs in each pair of tissues using the predicted expression from all models and the models whose  
595 performances on validation data were greater than 50% percentile in each tissue. (C) The major feature types contributed  
596 to the gene co-expression. We defined the gene pairs with the absolute Spearman's correlation greater than 0.3 and the  
597 sign of the correlation matched with one with the ground truth as the successfully predicted gene pairs. The successfully  
598 predicted gene pairs of the model trained with the full set of features were split into three groups based on the performance  
599 of the models trained with only RNA features or promoter features. (D) The effect of the binding site removal on co-  
600 expression between *LAPTM5* and *CD53*. We simulated gene expression profiles with random removals of the binding  
601 sites in each gene 10,000 times and computed a correlation between *LAPTM5* and *CD53* for each simulation. Multiple  
602 regression was used to estimate the effect of the binding site removal on the co-expression in each tissue. (E) The key  
603 regulators for the co-expression between *LAPTM5* and *CD53*. We simulated gene expression profiles with random KOs  
604 of regulators in each gene 10,000 times and computed a correlation between *LAPTM5* and *CD53* for each simulation.  
605 We used multiple regression to estimate the effect of the KO on the co-expression in each tissue and identified the  
606 consensus regulators across tissues. (F) Percent of the co-expression relationship explained by the expression levels of  
607 the key regulators. The white diamond and the error bars in the bar indicated the average and 95% percentile of the  
608 percent of variance explained by randomly picked regulators, respectively. The scatter plots show the effect of the key  
609 regulators on the co-expression.

## Figure 7

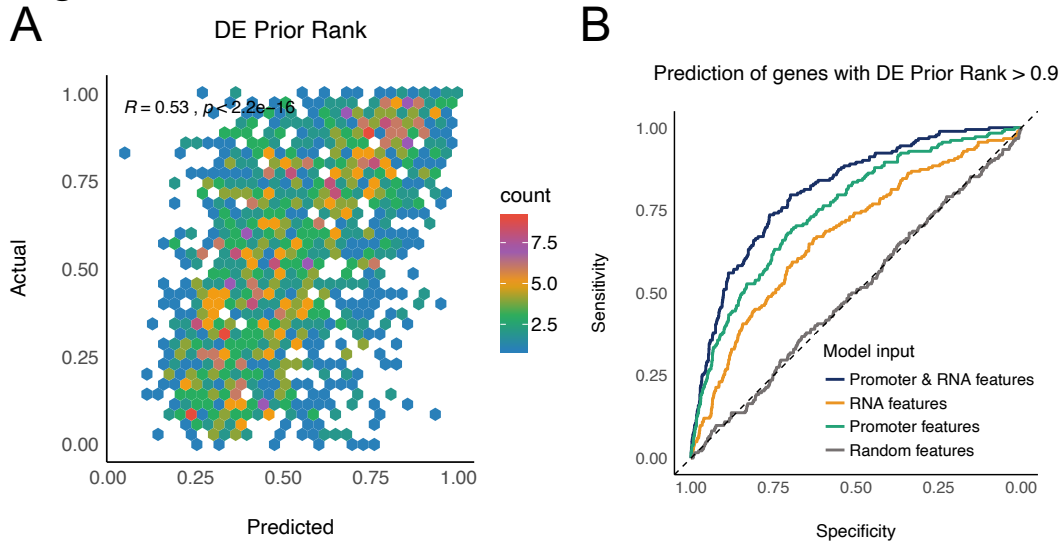

610

611 **Figure 7.** DEcode predicts gene's prior probability of differential expression. (A) The scatter plots showing the relations  
612 between predicted and actual DE prior rank. The predicted logit of DE prior rank was converted to probability and  
613 compared with actual DE prior rank with Spearman's correlation. (B) The performances of the models trained with a  
614 distinct feature set. ROC represents the performance of model predicting genes with DE prior rank greater than 0.9.
